# Supplementary material
Source: PubMed Central journal article supplement (PMC3238459)
Supplement: supp_111.017137_Materials.pdf [file supp_111.017137_Materials.pdf]

## ONLINE SUPPLEMENTAL MATERIAL 1

### Cognitive test descriptions

#### *Mini-Mental State Examination (MMSE)*

The MMSE is a brief mental status test measuring orientation, concentration, immediate and delayed memory, language and constructional praxis. (1) Scores range from 0 to 30, with higher scores indicating better cognitive performance. The MMSE has been administered in the BLSA since the mid-1980s.

#### *Benton Visual Retention Test (BVRT)*

The BVRT is a test of short-term visual memory and constructional abilities.(2) Administration A has been used in the BLSA since 1960, with a modified error scoring system, based on the BVRT Manual scoring, such that higher scores indicate poorer visual memory.

#### *California Verbal Learning Test (CVLT)*

The CVLT is a 16-item shopping list measuring verbal learning and memory. The variables of interest in this study were List A sum across five learning trials and long delay free recall. Scores ranged from 0 to 80 for List A sum and 0 to 16 for long delay free recall. Higher scores indicate better verbal memory. The CVLT has been administered in the BLSA since 1993, and is described in detail elsewhere. (3)

#### *Verbal Fluency Tests (VFT-L and VFT-C)*

The verbal fluency measures of both letter (F, A, S) (4-5) and category (fruits, animals, vegetables) fluency (6) were included. Letter fluency measures phonemic, and category fluency measures semantic fluency. Participants were required to generate as

many words as possible starting with either a specific letter or category, for 60 seconds. Higher scores indicate better verbal fluency, with the total number of words, minus intrusions and perseverations analyzed for each test. The verbal fluency tests have been administered in the BLSA since the mid 1980s.

#### *Trails A and B*

Trail Making Tests A and B (Trails A and B) are tests of attention (Trails A) and executive functioning (Trails B), specifically cognitive control and visuo-motor scanning. (7) When errors were committed the participant corrected the error by returning to his/her last correct response and continuing from there. The stop-watch recorded the time while corrections were made. Scores reflected time to completion (in seconds) separately for Trails A and B. Higher scores indicate poorer performance.

#### *Digits Span Forward (DS-F) and Backward (DS-B)*

The Wechsler Adult Intelligence Scale-Revised (WAIS-R) Digit Span Forward and Backward tests (8) assess attention and working memory, respectively. Digits forward involves orally presenting a series of single digit numbers at increasing digit span lengths, for participants to repeat in the same order. The span length of numbers ranges from three to nine digits. Two trials at each span are presented. The test is discontinued when the participant incorrectly repeats both trials at a specified span. Digits backward is similar to digits forward, except that participants repeat a series of increasingly longer spans of single digit numbers in reverse order. The length of the span of numbers ranges from two to eight digits. Total scores for digits forward and backward are 14.

## References:

1. Folstein MF, Folstein SE, McHugh PR. "Mini-mental state". A practical method for grading the cognitive state of patients for the clinician. *J Psychiatr Res* 1975;12:189-98.
2. Benton AL, ed. Revised visual retention test (fifth edition). New York: The Psychological Corporation, 1974.
3. Delis DC, Freeland J, Kramer JH, Kaplan E. Integrating clinical assessment with cognitive neuroscience: construct validation of the California Verbal Learning Test. *J Consult Clin Psychol* 1988;56:123-30.
4. Lezak MD. Neuropsychological assessment, 2nd edition. New York: Oxford University Press, 1983.
5. Lezak MD. Neuropsychological assessment, 3rd edition. New York: Oxford University Press, 1995.
6. Rosen W. Verbal fluency in aging and dementia. *Journal of Clinical Neuropsychology* 1980;2:135-146.
7. Reitan R. Trail Making Test: Manual for Administration and Scoring. Tucson, AZ: Reitan Neuropsychological Laboratory, 1992.
8. Wechsler D. WAIS-R manual. Cleveland: The Psychological Corporation, 1981.

## ONLINE SUPPLEMENTAL MATERIAL 2

### Linear mixed models for prediction of cognitive performance, factor analysis of LARCC

A standard taxonomy of models (1) was used, starting from the unconditional means model (Model A), unconditional growth model (Model B), growth model with level-2 controlled effects of other factors namely sex, race/ethnicity, education and smoking status (Model C), growth model with level-2 controlled effects of other factors, adding a squared-age term that would allow the rate of change to vary with time (Model D). In all models, age was centered at 50 years, while education was centered at 16 years. The following equations apply to each of the models considered:

| Model | Level-1 model                                             | Level-2 model                                                                                                                                        | Composite model                                                                                                                                                               |
|-------|-----------------------------------------------------------|------------------------------------------------------------------------------------------------------------------------------------------------------|-------------------------------------------------------------------------------------------------------------------------------------------------------------------------------|
| A     | $Y_{ij} = \pi_{0i} + \varepsilon_{ij}$                    | $\pi_{0i} = \gamma_{00} + \zeta_{0i}$                                                                                                                | $Y_{ij} = \gamma_{00} + (\zeta_{0i} + \varepsilon_{ij})$                                                                                                                      |
| B     | $Y_{ij} = \pi_{0i} + \pi_{1i}Age_{50} + \varepsilon_{ij}$ | $\pi_{0i} = \gamma_{00} + \zeta_{0i}$<br><br>$\pi_{1i} = \gamma_{10} + \zeta_{1i}$                                                                   | $Y_{ij} = \gamma_{00} + \gamma_{10}Age_{50} + (\zeta_{0i} + \zeta_{1i}Age_{50} + \varepsilon_{ij})$                                                                           |
| C     | $Y_{ij} = \pi_{0i} + \pi_{1i}Age_{50} + \varepsilon_{ij}$ | $\pi_{0i} = \gamma_{00} + \sum_{k=1}^7 \gamma_{0k}Z_{ik} + \zeta_{0i}$<br><br>$\pi_{1i} = \gamma_{10} + \sum_{k=1}^7 \gamma_{1k}Z_{ik} + \zeta_{1i}$ | $Y_{ij} = \gamma_{00} + \sum_{k=1}^7 \gamma_{0k}Z_{ik} + \gamma_{10}Age_{50} + \sum_{k=1}^7 \gamma_{1k}Z_{ik}Age_{50} + (\zeta_{0i} + \zeta_{1i}Age_{50} + \varepsilon_{ij})$ |
| D     | $Y_{ij} = \pi_{0i} + \pi_{1i}Age_{50} + \varepsilon_{ij}$ | $\pi_{0i} = \gamma_{00} + \sum_{k=1}^7 \gamma_{0k}Z_{ik} + \zeta_{0i}$<br><br>$\pi_{1i} = \gamma_{10} + \sum_{k=1}^8 \gamma_{1k}Z_{ik} + \zeta_{1i}$ | $Y_{ij} = \gamma_{00} + \sum_{k=1}^7 \gamma_{0k}Z_{ik} + \gamma_{10}Age_{50} + \sum_{k=1}^8 \gamma_{1k}Z_{ik}Age_{50} + (\zeta_{0i} + \zeta_{1i}Age_{50} + \varepsilon_{ij})$ |

*Notations:*  $Y_{ij}$  is the response variable for each individual “i” and age at visit “j”.  $\pi_{0i}$  is the level-1 intercept for individual i;  $\pi_{1i}$  is the level-1 slope for individual i;  $\gamma_{00}$  is the level-2 intercept of the

random intercept  $\pi_{0i}$ ;  $\gamma_{10}$  is the level-2 intercept of the slope  $\pi_{1i}$ ;  $Z_{ik}$  is a vector of fixed covariates for each individual  $i$  that are used to predict level-1 intercepts and slopes;  $\zeta_{0i}$  and  $\zeta_{1i}$  are level-2 disturbances;  $\varepsilon_{ij}$  is the within-person level-1 disturbance. In model D, an additional  $Z_{ik}$  variable is added for  $Age_{50}$ , to account for quadratic age changes in the fixed effects portion of the model, which increased the number of  $k$  terms from 7 to 8 between models C and D.

Model D's improvement in fit compared to the simpler models was evaluated using Deviance, AIC and BIC statistics as well as pseudo- $R^2$ . In addition, residuals were plotted against predicted values to assess their normality. It is worth noting that the models were fit using the entire BLSA cohort ( $n=3005$ ) and not only those who were eligible for the main analysis to improve reliability of predicted estimates. Finally, empirical Bayes estimators of outcomes  $Y_{ij}$  were predicted from Model D at specific ages using the following method, after estimating the random effects ( $\zeta_{0i}$  for the intercept and  $\zeta_{1i}$  for the slope) for each individual  $i$ :

$$\text{Intercept} \quad \pi_{0i} = \gamma_{00} + \sum_{k=1}^7 \gamma_{0k} Z_{ik} + \zeta_{0i}$$

$$\text{Slope} \quad \pi_{1i} = \gamma_{10} + \sum_{k=1}^8 \gamma_{1k} Z_{ik} + \zeta_{1i}$$

$$\text{Prediction} \quad Y_{ij} = \pi_{0i} + \pi_{1i}(Age_{50})_i$$

where  $(Age_{50})_i$  is assigned individual mean age at follow-up values centered at age 50, thus positive values if  $Age > 50$  and negative values if  $Age < 50$ .

$Y_{ij}$  in this case is the cognitive score for a specific test  $j$  and individual  $i$ . Slopes  $\pi_{1i}$  were estimated for each test  $j$  and individual  $i$ , taking into account non-linear changes with age (i.e. the age-square term) at individual-level mean follow-up age and those were labeled as LARCC (Longitudinal annual rate of cognitive change) and interpreted as annual rate of change in each cognitive score between ages 50 y and mean follow-up age.

Following this estimation, LARCC for each cognitive test score were entered into a factor analysis model as measured variables (2) in which a number of common factors were extracted

based on common variance, factor loadings estimated and the residual variance labeled as uniqueness for each LARCC. The common factor model can be summarized as follows:

$$\text{LARCC}_i = \sum_{j=1}^k \lambda_{ij} * \text{Domain}_j + \varphi_i$$

Where LARCC<sub>i</sub> is the standardized z-score for each cognitive test LARCC,  $\lambda_{ij}$  is the factor loading for each LARCC and each factor, Domain<sub>j</sub> is the standardized z-score for each factor j, and  $\varphi_i$  is the residual error, the squared value of which is the uniqueness. The sum of squared factor loadings for each LARCC<sub>i</sub> is the communality or the common variance that is accounted for by the extracted factors.

An eigenvalue>1 rule was used and the scree plot was observed to determine the adequate number of extracted factors that would produce the best model fit. The factor loadings were then rotated using varimax orthogonal rotation and the factors were interpreted and cognitive domains labeled accordingly, with cutoff point of 0.40 or more for significant loading. The factor scores (z-scores) were predicted and used as markers of LARCC for specific cognitive domains.

**Appendix Table 1.** Varimax rotated two-factor solution of LARCC, using nine cognitive test scores LARCC as measured variables.

| LARCC <sub>i</sub> | Factor loadings, $\lambda_{ij}$ |          | Uniqueness, $\varphi_i$ |
|--------------------|---------------------------------|----------|-------------------------|
|                    | Domain 1                        | Domain 2 |                         |
| BVRT               | -0.62*                          | -0.27    | 0.54                    |
| CVLT-List A        | +0.84*                          | 0.12     | 0.29                    |
| CVLT-DR            | +0.82*                          | -0.06    | 0.33                    |
| VFT-L              | +0.26                           | +0.59*   | 0.58                    |
| VFT-C              | +0.16                           | +0.43*   | 0.79                    |
| Trails A           | -0.44*                          | -0.33    | 0.70                    |
| Trails B           | -0.56*                          | -0.51*   | 0.42                    |
| DS-F               | -0.26                           | +0.48*   | 0.70                    |
| DS-B               | +0.07                           | +0.65*   | 0.57                    |
| Eigenvalue         | 2.92                            | 1.15     |                         |
| % var explained    | 0.57                            | 0.39     |                         |

*Note:* See list of abbreviations.

\*factor loading>0.40. Domains were labeled as follows: “Domain 1: “Memory and executive function: earlier decline”, Domain 2: “Verbal fluency and attention: later decline”, based on the combination of significantly high factor loadings and the corresponding measured variables or LARCC<sub>i</sub>. With the exception of Trails B, all LARCC<sub>i</sub> factor loadings were significant only for one of the two domains, creating a relatively simple structure that is easy to label and interpret. The labels were determined based on the nature of the cognitive test and the timing that decline in those domains is usually observed during the life course (earlier vs. later).

**Sources:**

1. Singer JD, Willet JB, eds. Applied Longitudinal Data Analysis: Modeling change and event occurrence. New York: Oxford University Press, 2003.
2. Sharma S. Applied multivariate techniques. USA: Wiley, 1996.

## Online Supplemental Material 3

Linkage disequilibrium (LD) structure in 20kb region of VDR and LRP2 gene.

Pairwise linkage disequilibrium ( $D'$ ) of SNP in the Illumina 550K panel within 20kb of VDR (A) and LRP2 (B) is presented. The strength of LD is displayed using the standard color scheme from Haploview (bright red - LOD score  $>2$ ,  $D'=1$ ; shade of pink – LOD score  $<2$ ,  $D'=1$ ; blue - LOD score  $>2$ ,  $D' <1$ ; white - LOD score  $<2$ ,  $D' = 1$ ).



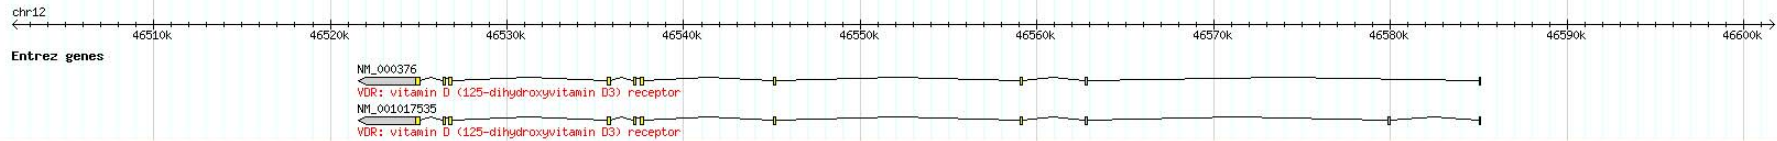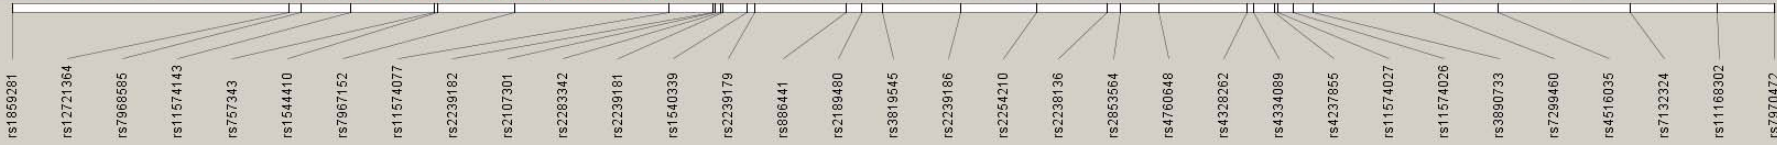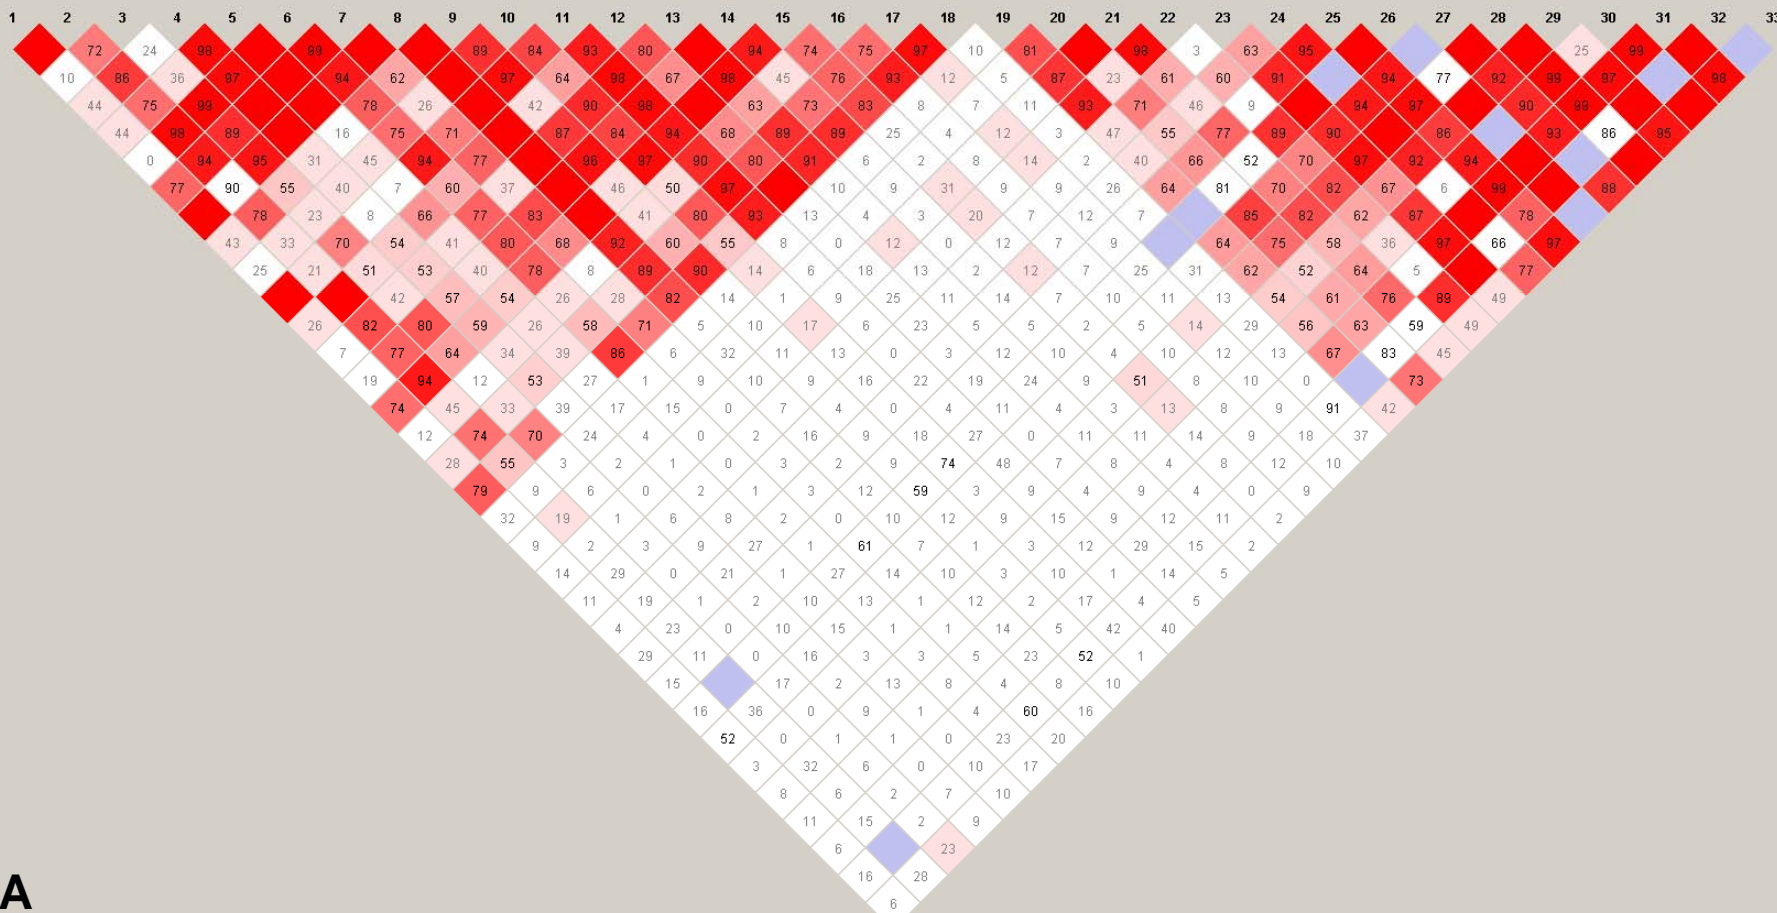

**A**

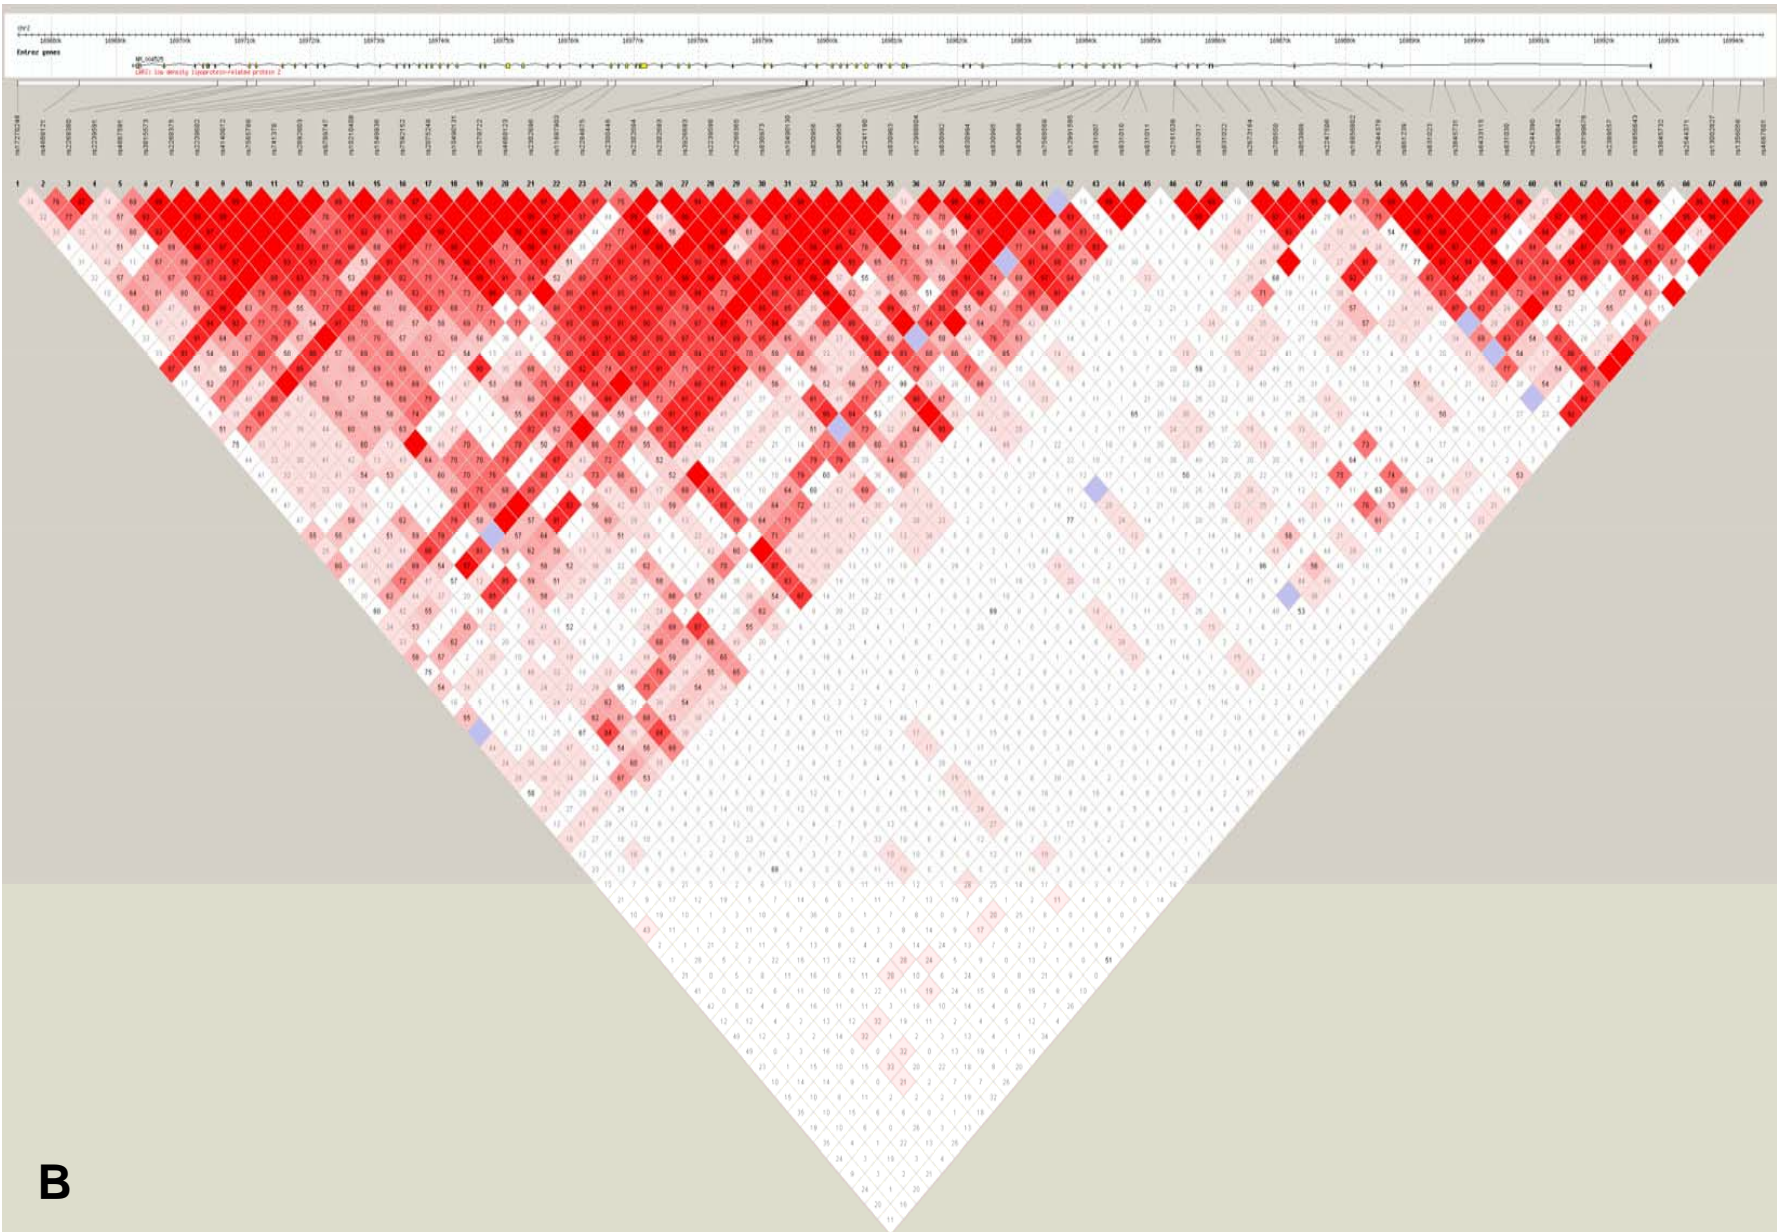

**B**

**Online Supplemental Material 4.** VDR gene single nucleotide polymorphisms' (SNP) associations with predicted annual rate of cognitive change between age 50y and mean age of follow-up: Multiple OLS regression analysis with VDR SNPs entered alternatively; Baltimore Longitudinal Study of Aging

|                                | Predicted annual rate of cognitive change between age 50y and mean age of follow-up <sup>1</sup> |           |       |                    |                                                    |           |       |                   |
|--------------------------------|--------------------------------------------------------------------------------------------------|-----------|-------|--------------------|----------------------------------------------------|-----------|-------|-------------------|
|                                | All time points: Prediction I                                                                    |           |       |                    | Time points prior to dementia onset: Prediction II |           |       |                   |
|                                | N                                                                                                | $\beta^2$ | SEE   | p-value for trend  | N                                                  | $\beta^2$ | SEE   | p-value for trend |
| <b>MMSE: Models 1-4</b>        |                                                                                                  |           |       |                    |                                                    |           |       |                   |
| VDR: rs11568820 (CdX-2: T/C)   | 492                                                                                              |           |       | 0.511 <sup>5</sup> | 485                                                |           |       | 0.095             |
| TC vs. TT                      |                                                                                                  | -0.024    | 0.021 |                    |                                                    | -0.010    | 0.011 |                   |
| CC vs. TT                      |                                                                                                  | -0.010    | 0.020 |                    |                                                    | +0.002    | 0.011 |                   |
| VDR: rs1544410 (BsmI: G/A)     | 494                                                                                              |           |       | 0.139              | 487                                                |           |       | 0.371             |
| GA vs. GG                      |                                                                                                  | -0.001    | 0.009 |                    |                                                    | -0.004    | 0.005 |                   |
| AA vs. GG                      |                                                                                                  | +0.021    | 0.012 |                    |                                                    | +0.008    | 0.006 |                   |
| VDR: rs7975232 (ApAI: A/C)     | 492                                                                                              |           |       | 0.080 <sup>3</sup> | 485                                                |           |       | 0.113             |
| AC vs. AA                      |                                                                                                  | -0.008    | 0.010 |                    |                                                    | -0.009    | 0.005 |                   |
| CC vs. AA                      |                                                                                                  | -0.021    | 0.012 |                    |                                                    | -0.008    | 0.006 |                   |
| VDR: rs731236 (TaqI: G/A)      | 492                                                                                              |           |       | 0.261              | 485                                                |           |       | 0.613             |
| GA vs. GG                      |                                                                                                  | -0.022    | 0.011 |                    |                                                    | -0.011    | 0.006 |                   |
| AA vs. GG                      |                                                                                                  | -0.017    | 0.012 |                    |                                                    | -0.006    | 0.006 |                   |
| <b>BVRT: Models 1-4</b>        |                                                                                                  |           |       |                    |                                                    |           |       |                   |
| VDR: rs11568820 (CdX-2: T/C)   | 616                                                                                              |           |       | 0.541              | 609                                                |           |       | 0.523             |
| TC vs. TT                      |                                                                                                  | +0.005    | 0.014 |                    |                                                    | +0.000    | 0.012 |                   |
| CC vs. TT                      |                                                                                                  | -0.000    | 0.014 |                    |                                                    | -0.003    | 0.012 |                   |
| VDR: rs1544410 (BsmI: G/A)     | 621                                                                                              |           |       | 0.956              | 614                                                |           |       | 1.000             |
| GA vs. GG                      |                                                                                                  | +0.002    | 0.006 |                    |                                                    | +0.002    | 0.005 |                   |
| AA vs. GG                      |                                                                                                  | -0.002    | 0.007 |                    |                                                    | +0.001    | 0.007 |                   |
| VDR: rs7975232 (ApAI: A/C)     | 616                                                                                              |           |       | 0.951              | 609                                                |           |       | 0.803             |
| AC vs. AA                      |                                                                                                  | +0.003    | 0.006 |                    |                                                    | +0.002    | 0.005 |                   |
| CC vs. AA                      |                                                                                                  | -0.001    | 0.007 |                    |                                                    | -0.002    | 0.006 |                   |
| VDR: rs731236 (TaqI: G/A)      | 616                                                                                              |           |       | 0.755              | 609                                                |           |       | 0.625             |
| GA vs. GG                      |                                                                                                  | +0.002    | 0.007 |                    |                                                    | +0.000    | 0.006 |                   |
| AA vs. GG                      |                                                                                                  | -0.002    | 0.008 |                    |                                                    | -0.003    | 0.007 |                   |
| <b>CVLT-List A: Models 1-4</b> |                                                                                                  |           |       |                    |                                                    |           |       |                   |
| VDR: rs11568820 (CdX-2: T/C)   | 606                                                                                              |           |       | 0.253              | 588                                                |           |       | 0.239             |
| TC vs. TT                      |                                                                                                  | -0.049    | 0.049 |                    |                                                    | -0.039    | 0.042 |                   |
| CC vs. TT                      |                                                                                                  | -0.013    | 0.047 |                    |                                                    | -0.008    | 0.040 |                   |

|                              |     |        |       |                    |     |        |       |                    |
|------------------------------|-----|--------|-------|--------------------|-----|--------|-------|--------------------|
| VDR: rs1544410 (BsmI: G/A)   | 611 |        |       | 0.875              | 593 |        |       | 0.829              |
| GA vs. GG                    |     | -0.008 | 0.020 |                    |     | -0.007 | 0.017 |                    |
| AA vs. GG                    |     | +0.008 | 0.026 |                    |     | +0.009 | 0.022 |                    |
| VDR: rs7975232 (ApAI: A/C)   | 606 |        |       | 0.082              | 588 |        |       | 0.101              |
| AC vs. AA                    |     | -0.017 | 0.021 |                    |     | -0.023 | 0.018 |                    |
| CC vs. AA                    |     | -0.045 | 0.025 |                    |     | -0.034 | 0.022 |                    |
| VDR: rs731236 (TaqI: G/A)    | 606 |        |       | 0.973              | 588 |        |       | 0.955              |
| GA vs. GG                    |     | -0.016 | 0.025 |                    |     | -0.016 | 0.021 |                    |
| AA vs. GG                    |     | -0.005 | 0.026 |                    |     | -0.006 | 0.022 |                    |
| <b>CVLT-DR: MODEL 1-4</b>    |     |        |       |                    |     |        |       |                    |
| VDR: rs11568820 (CdX-2: T/C) | 606 |        |       | 0.190              | 588 |        |       | 0.237              |
| TC vs. TT                    |     | +0.000 | 0.012 |                    |     | +0.000 | 0.010 |                    |
| CC vs. TT                    |     | +0.007 | 0.011 |                    |     | +0.005 | 0.010 |                    |
| VDR: rs1544410 (BsmI: G/A)   | 611 |        |       | 0.675              | 593 |        |       | 0.711              |
| GA vs. GG                    |     | -0.007 | 0.005 |                    |     | -0.006 | 0.004 |                    |
| AA vs. GG                    |     | -0.000 | 0.006 |                    |     | +0.000 | 0.005 |                    |
| VDR: rs7975232 (ApAI: A/C)   | 606 |        |       | 0.449              | 588 |        |       | 0.576              |
| AC vs. AA                    |     | -0.005 | 0.005 |                    |     | -0.005 | 0.004 |                    |
| CC vs. AA                    |     | -0.004 | 0.006 |                    |     | -0.002 | 0.005 |                    |
| VDR: rs731236 (TaqI: G/A)    | 606 |        |       | 0.487              | 588 |        |       | 0.496              |
| GA vs. GG                    |     | -0.006 | 0.006 |                    |     | -0.006 | 0.005 |                    |
| AA vs. GG                    |     | +0.002 | 0.006 |                    |     | +0.001 | 0.005 |                    |
| <b>VFT-C: MODEL 1-4</b>      |     |        |       |                    |     |        |       |                    |
| VDR: rs11568820 (CdX-2: T/C) | 512 |        |       | 0.800              | 505 |        |       | 0.568              |
| TC vs. TT                    |     | -0.031 | 0.027 |                    |     | -0.016 | 0.017 |                    |
| CC vs. TT                    |     | -0.025 | 0.026 |                    |     | -0.016 | 0.017 |                    |
| VDR: rs1544410 (BsmI: G/A)   | 513 |        |       | 0.725 <sup>5</sup> | 506 |        |       | 0.674 <sup>5</sup> |
| GA vs. GG                    |     | -0.006 | 0.011 |                    |     | -0.003 | 0.008 |                    |
| AA vs. GG                    |     | +0.008 | 0.015 |                    |     | 0.006  | 0.010 |                    |
| VDR: rs7975232 (ApAI: A/C)   | 512 |        |       | 0.269 <sup>5</sup> | 505 |        |       | 0.188 <sup>5</sup> |
| AC vs. AA                    |     | -0.006 | 0.012 |                    |     | -0.010 | 0.008 |                    |
| CC vs. AA                    |     | -0.017 | 0.015 |                    |     | -0.012 | 0.010 |                    |
| VDR: rs731236 (TaqI: G/A)    | 512 |        |       | 0.595 <sup>5</sup> | 505 |        |       | 0.520 <sup>5</sup> |
| GA vs. GG                    |     | -0.014 | 0.014 |                    |     | -0.009 | 0.010 |                    |
| AA vs. GG                    |     | -0.010 | 0.015 |                    |     | -0.007 | 0.010 |                    |
| <b>VFT-L: MODEL 1-4</b>      |     |        |       |                    |     |        |       |                    |
| VDR: rs11568820 (CdX-2: T/C) | 512 |        |       | 0.712              | 502 |        |       | 0.591              |
| TC vs. TT                    |     | -0.034 | 0.024 |                    |     | -0.021 | 0.017 |                    |

|                              |     |        |       |       |     |        |       |       |
|------------------------------|-----|--------|-------|-------|-----|--------|-------|-------|
| CC vs. TT                    |     | -0.028 | 0.023 |       |     | -0.019 | 0.016 |       |
| VDR: rs1544410 (BsmI: G/A)   | 513 |        |       | 0.710 | 503 |        |       | 0.638 |
| GA vs. GG                    |     | +0.005 | 0.010 |       |     | +0.004 | 0.007 |       |
| AA vs. GG                    |     | -0.008 | 0.014 |       |     | -0.007 | 0.010 |       |
| VDR: rs7975232 (ApAI: A/C)   | 512 |        |       | 0.743 | 502 |        |       | 0.846 |
| AC vs. AA                    |     | +0.021 | 0.011 |       |     | +0.010 | 0.008 |       |
| CC vs. AA                    |     | +0.001 | 0.013 |       |     | +0.000 | 0.009 |       |
| VDR: rs731236 (TaqI: G/A)    | 512 |        |       | 0.787 | 502 |        |       | 0.677 |
| GA vs. GG                    |     | +0.011 | 0.013 |       |     | +0.009 | 0.009 |       |
| AA vs. GG                    |     | +0.006 | 0.014 |       |     | +0.006 | 0.010 |       |
| <b>Trails A: MODEL 1-4</b>   |     |        |       |       |     |        |       |       |
| VDR: rs11568820 (CdX-2: T/C) | 475 |        |       | 0.744 | 465 |        |       | 0.632 |
| TC vs. TT                    |     | +0.195 | 0.221 |       |     | +0.129 | 0.130 |       |
| CC vs. TT                    |     | +0.170 | 0.210 |       |     | +0.118 | 0.124 |       |
| VDR: rs1544410 (BsmI: G/A)   | 476 |        |       | 0.826 | 466 |        |       | 0.638 |
| GA vs. GG                    |     | +0.127 | 0.095 |       |     | +0.041 | 0.057 |       |
| AA vs. GG                    |     | -0.080 | 0.124 |       |     | -0.058 | 0.074 |       |
| VDR: rs7975232 (ApAI: A/C)   | 475 |        |       | 0.898 | 464 |        |       | 0.169 |
| AC vs. AA                    |     | -0.064 | 0.100 |       |     | +0.032 | 0.059 |       |
| CC vs. AA                    |     | +0.030 | 0.122 |       |     | +0.103 | 0.073 |       |
| VDR: rs731236 (TaqI: G/A)    | 475 |        |       | 0.818 | 465 |        |       | 0.652 |
| GA vs. GG                    |     | +0.197 | 0.117 |       |     | +0.093 | 0.070 |       |
| AA vs. GG                    |     | +0.076 | 0.124 |       |     | +0.054 | 0.074 |       |
| <b>Trails B: MODEL 1-4</b>   |     |        |       |       |     |        |       |       |
| VDR: rs11568820 (CdX-2: T/C) | 475 |        |       | 0.683 | 464 |        |       | 0.820 |
| TC vs. TT                    |     | +0.073 | 0.369 |       |     | +0.085 | 0.317 |       |
| CC vs. TT                    |     | +0.118 | 0.351 |       |     | +0.092 | 0.301 |       |
| VDR: rs1544410 (BsmI: G/A)   | 476 |        |       | 0.459 | 465 |        |       | 0.443 |
| GA vs. GG                    |     | +0.152 | 0.158 |       |     | +0.164 | 0.136 |       |
| AA vs. GG                    |     | -0.236 | 0.207 |       |     | -0.232 | 0.181 |       |
| VDR: rs7975232 (ApAI: A/C)   | 475 |        |       | 0.169 | 464 |        |       | 0.093 |
| AC vs. AA                    |     | +0.055 | 0.165 |       |     | +0.080 | 0.143 |       |
| CC vs. AA                    |     | +0.296 | 0.204 |       |     | +0.308 | 0.177 |       |
| VDR: rs731236 (TaqI: G/A)    | 475 |        |       | 0.422 | 464 |        |       | 0.405 |
| GA vs. GG                    |     | +0.368 | 0.196 |       |     | +0.375 | 0.171 |       |
| AA vs. GG                    |     | +0.238 | 0.206 |       |     | +0.233 | 0.180 |       |

|                                      |     |        |       |                    |     |        |       |                    |
|--------------------------------------|-----|--------|-------|--------------------|-----|--------|-------|--------------------|
| <b>DS-F: MODEL 1-4</b>               | 608 |        |       | 0.889              | 593 |        |       | 0.778              |
| VDR: rs11568820 (CdX-2: T/C)         |     | -0.000 | 0.004 |                    |     | +0.000 | 0.001 |                    |
| TC vs. TT                            |     | +0.000 | 0.004 |                    |     | +0.000 | 0.001 |                    |
| CC vs. TT                            |     |        |       |                    |     |        |       |                    |
| VDR: rs1544410 (BsmI: G/A)           | 614 |        |       | 0.869              | 599 |        |       | 0.917              |
| GA vs. GG                            |     | -0.000 | 0.001 |                    |     | -0.000 | 0.001 |                    |
| AA vs. GG                            |     | +0.000 | 0.001 |                    |     | +0.000 | 0.001 |                    |
| VDR: rs7975232 (ApAI: A/C)           | 608 |        |       | 0.750 <sup>5</sup> | 593 |        |       | 0.829              |
| AC vs. AA                            |     | -0.001 | 0.001 |                    |     | -0.001 | 0.001 |                    |
| CC vs. AA                            |     | -0.000 | 0.001 |                    |     | -0.000 | 0.001 |                    |
| VDR: rs731236 (TaqI: G/A)            | 608 |        |       | 0.862 <sup>5</sup> | 593 |        |       | 0.921 <sup>5</sup> |
| GA vs. GG                            |     | -0.000 | 0.001 |                    |     | +0.000 | 0.001 |                    |
| AA vs. GG                            |     | -0.000 | 0.001 |                    |     | +0.000 | 0.001 |                    |
| <b>DS-B: MODEL 1-4</b>               |     |        |       |                    |     |        |       |                    |
| VDR: rs11568820 (CdX-2: T/C)         | 608 |        |       | 0.719              | 593 |        |       | 0.605              |
| TC vs. TT                            |     | +0.000 | 0.003 |                    |     | -0.000 | 0.003 |                    |
| CC vs. TT                            |     | +0.000 | 0.003 |                    |     | +0.004 | 0.003 |                    |
| VDR: rs1544410 (BsmI: G/A)           | 614 |        |       | 0.373              | 599 |        |       | 0.407              |
| GA vs. GG                            |     | +0.001 | 0.001 |                    |     | +0.001 | 0.001 |                    |
| AA vs. GG                            |     | +0.001 | 0.001 |                    |     | +0.001 | 0.002 |                    |
| VDR: rs7975232 (ApAI: A/C)           | 608 |        |       | 0.502              | 593 |        |       | 0.491              |
| AC vs. AA                            |     | -0.001 | 0.001 |                    |     | -0.001 | 0.001 |                    |
| CC vs. AA                            |     | -0.001 | 0.001 |                    |     | -0.001 | 0.002 |                    |
| VDR: rs731236 (TaqI: G/A)            | 608 |        |       | 0.407              | 593 |        |       | 0.444              |
| GA vs. GG                            |     | -0.000 | 0.001 |                    |     | +0.000 | 0.001 |                    |
| AA vs. GG                            |     | -0.001 | 0.001 |                    |     | -0.001 | 0.002 |                    |
| <b>Cognitive Domain 1: MODEL 1-4</b> |     |        |       |                    |     |        |       |                    |
| VDR: rs11568820 (CdX-2: T/C)         | 466 |        |       | 0.596              | 445 |        |       | 0.552              |
| TC vs. TT                            |     | -0.10  | 0.21  |                    |     | +0.02  | 0.21  |                    |
| CC vs. TT                            |     | -0.02  | 0.20  |                    |     | +0.07  | 0.20  |                    |
| VDR: rs1544410 (BsmI: G/A)           | 467 |        |       | 0.957              | 446 |        |       | 0.937              |
| GA vs. GG                            |     | -0.07  | 0.09  |                    |     | -0.09  | 0.09  |                    |
| AA vs. GG                            |     | +0.02  | 0.12  |                    |     | +0.03  | 0.12  |                    |
| VDR: rs7975232 (ApAI: A/C)           | 466 |        |       | 0.194              | 445 |        |       | 0.219              |
| AC vs. AA                            |     | -0.02  | 0.09  |                    |     | -0.07  | 0.09  |                    |
| CC vs. AA                            |     | -0.16  | 0.11  |                    |     | -0.14  | 0.12  |                    |
| VDR: rs731236 (TaqI: G/A)            | 466 |        |       | 0.857              | 445 |        |       | 0.964              |

|                                      |     |       |      |       |     |       |       |
|--------------------------------------|-----|-------|------|-------|-----|-------|-------|
| GA vs. GG                            |     | -0.08 | 0.11 |       |     | -0.11 | 0.11  |
| AA vs. GG                            |     | -0.01 | 0.12 |       |     | -0.02 | 0.12  |
| <b>Cognitive Domain 2: MODEL 1-4</b> |     |       |      |       |     |       |       |
| VDR: rs11568820 (CdX-2: T/C)         | 466 |       |      | 0.190 | 445 |       | 0.228 |
| TC vs. TT                            |     | -0.21 | 0.15 |       |     | -0.20 | 0.15  |
| CC vs. TT                            |     | -0.24 | 0.15 |       |     | -0.22 | 0.14  |
| VDR: rs1544410 (BsmI: G/A)           | 467 |       |      | 0.549 | 446 |       | 0.577 |
| GA vs. GG                            |     | -0.04 | 0.06 |       |     | -0.04 | 0.06  |
| AA vs. GG                            |     | +0.08 | 0.08 |       |     | +0.07 | 0.08  |
| VDR: rs7975232 (ApAI: A/C)           | 466 |       |      | 0.675 | 445 |       | 0.397 |
| AC vs. AA                            |     | -0.01 | 0.07 |       |     | -0.06 | 0.07  |
| CC vs. AA                            |     | -0.04 | 0.08 |       |     | -0.06 | 0.08  |
| VDR: rs731236 (TaqI: G/A)            | 466 |       |      | 0.468 | 445 |       | 0.614 |
| GA vs. GG                            |     | -0.10 | 0.08 |       |     | -0.10 | 0.08  |
| AA vs. GG                            |     | -0.08 | 0.08 |       |     | -0.06 | 0.08  |

**Abbreviations:** BMI, body mass index (calculated as weight in kg/square of height in meters); BVRT=Benton Visual Retention Test; CVLT-List A=California Verbal Learning Test, List A; CVLT-DR=California Verbal Learning Test, Delayed Recall; DS-B=Digits Span Backwards; DS-F=Digits Span Forward; MMSE=Mini-Mental State Examination; OLS=Ordinary Least Square; SNP=Single Nucleotide polymorphism; Trails A and B= Trailmaking test, parts A and B; VDR=Vitamin D receptor gene; VFT-C=Verbal fluency test-categorical; VFT-L=Verbal fluency test-letter . **Note that each SNP is denoted by an rs number followed by the polymorphism in which one nucleotide is replaced by another (e.g. T/C or G/A).**

<sup>1</sup> Cognitive scores were predicted at mean age at follow-up prior to onset of dementia or for all time points using a linear mixed model controlling for sex, race/ethnicity, education (years), and smoking status, with age added among the fixed effect variables to allow for quadratic non-linear change. The slope or annual rate of change was predicted from these models at the mean age at follow-up (i.e. between age 50 and individual mean age of follow-up for each cognitive test)( See Online Supplemental Material 2 for more details).

<sup>2</sup> Based on multiple OLS regression models with outcome being cognitive annual rate of change and main exposures being the four VDR SNPs, entered alternatively in each model. The model controlled for first-visit age, mean age at follow-up, education, first-visit smoking status, first-visit self-reported type 2 diabetes, hypertension, cardiovascular disease, and body mass index.

<sup>3</sup> Marginally significant main effects after familywise bonferroni correction:  $p < 0.05$  for MMSE or BVRT or cognitive domains and  $p < 0.025$  for other cognitive tests;

<sup>4</sup> Significant main effects after familywise bonferroni correction:  $p < 0.025$  for MMSE and cognitive domains and  $p < 0.0125$  for other cognitive tests;

<sup>5</sup>  $P < 0.05$  for null hypothesis that sex\*SNP interaction term=0 in a model where main effect of sex was added.
